# Supplementary material for: Constructing metallosalen poly(ionic liquid)s to boost photocatalytic CO 2 reduction
Source: Royal Society of Chemistry journal article supplement (doi:10.1039/d4ta05006a), 2024-01-01
Supplement: d4ta05006a1.pdf [file d4ta05006a1.pdf]

## Supporting Information

### Constructing metallosalen poly(ionic liquid)s to boost photocatalytic CO<sub>2</sub> reduction

Xi Chen,<sup>a, †</sup> Wei Zhou,<sup>b, †</sup> Xu Fang,<sup>a</sup> Cheng Li,<sup>c</sup> Die Cong,<sup>a</sup> Tie Yu,<sup>a</sup> Wei-Qiao Deng<sup>a</sup> and Chengcheng Liu<sup>\*a</sup>

<sup>a</sup>. Institute of Frontier Chemistry, School of Chemistry and Chemical Engineering, Shandong University, 72 Binhai Road, Qingdao, 266237, Shandong, China.

<sup>b</sup>. School of Chemistry and Chemical Engineering, Hainan University, 58 Renmin Avenue, Haikou, 570228, Hainan, China.

<sup>c</sup>. Institute of Ultrafast Optical Physics, Department of Applied Physics and MIIT Key Laboratory of Semiconductor Microstructure and Quantum Sensing, Nanjing University of Science and Technology, Nanjing, 210094, Jiangsu, China.

\*Corresponding Author: chengcheng.liu@sdu.edu.cn.

<sup>†</sup>X. Chen and W. Zhou contributed equally to this work.

|    |                                                                          |    |
|----|--------------------------------------------------------------------------|----|
| 16 | <b>Table of contents</b>                                                 |    |
| 17 | <b>1. Supplemental experimental procedures</b>                           | 3  |
| 18 | <b>1.1. Characterization</b>                                             | 3  |
| 19 | <b>1.2 Synthetic procedures</b>                                          | 3  |
| 20 | 1.2.1 The synthesis of Co(Salen)                                         | 3  |
| 21 | 1.2.1 The synthesis of Co(Salen)-PIL                                     | 4  |
| 22 | 1.2.3 The synthesis of Co(Salen)-CHO                                     | 4  |
| 23 | 1.2.4 The synthesis of Co(Salen)-CMP                                     | 5  |
| 24 | <b>1.4 Photoelectrochemical measurements</b>                             | 5  |
| 25 | <b>1.5 Mott–Schottky plots</b>                                           | 6  |
| 26 | <b>1.6 Solid-state photoluminescence</b>                                 | 6  |
| 27 | <b>1.7 Photocatalytic CO<sub>2</sub> reduction recycling experiments</b> | 6  |
| 28 | <b>2. Supplemental figures and data</b>                                  | 7  |
| 29 | <b>3. References</b>                                                     | 24 |
| 30 |                                                                          |    |

## 32 1. Supplemental experimental procedures

### 33 1.1. Characterization

34 The FT-IR spectra were recorded by Bruker's VERTEX 70v in the range of 400-4000  
35  $\text{cm}^{-1}$ . Solid-state  $^{13}\text{C}$  CP/MAS NMR was performed on a Bruker ADVANCE III HD  
36 400 MHz spectrometer. Thermogravimetric analysis was performed by using Netzsch  
37 Model STA449C instrument over the temperature range from room temperature to 800  
38  $^{\circ}\text{C}$  under Ar atmosphere. Gaseous products were detected using gas chromatography  
39 (Agilent Technologies-8890). UV-vis spectra were recorded using an Agilent Cary  
40 5000 spectrometer from 200 to 1400 nm. Nitrogen sorption isotherms were measured  
41 at 77 K with Quantachrome Automated Surface Area & Pore Size Analyzer.

### 42 1.2 Synthetic procedures

#### 43 1.2.1 The synthesis of Co(Salen)

44 4-Hydroxynicotinaldehyde (491.4 mg, 4 mmol) was placed in 100 mL flask, vacuumed  
45 and then passed through nitrogen for three times. Ethylenediamine (0.1336 mL, 2  
46 mmol) was mixed with ethanol (20 mL), and then the mixture was injected into the  
47 flask with a syringe. After stirring well at room temperature, the solution appeared  
48 yellow. Then  $\text{CoSO}_4 \cdot 7\text{H}_2\text{O}$  (562.4 mg, 2mmol) was dissolved in 5mL deionized water,  
49 the solution was injected into a flask with a syringe, and the temperature was raised to  
50  $75^{\circ}\text{C}$  and stirred for 50 min in a nitrogen atmosphere. After the reaction was completed  
51 and cooled to room temperature, the mixture was drained and washed with absolute  
52 ethanol, and finally the yellow powder was dried under vacuum at  $60^{\circ}\text{C}$  for 12 h to  
53 obtain Co (Salen). The final product mass was 760 mg, and the yield was 64.7%.

### 54 1.2.1 The synthesis of Co(Salen)-PIL

55 Co(Salen) (327 mg, 1mmol), heptazine chloride (HTC) (166 mg, 0.6 mmol) were  
56 placed in a 25 mL flask, evacuated and passed with nitrogen, and then toluene (5 mL)  
57 was injected into the flask with a syringe, and the mixture was condensed and refluxed  
58 for 72 h at 150 °C under a nitrogen atmosphere. After the reaction was completed and  
59 cooled to room temperature, the mixture was filtered and washed with tetrahydrofuran,  
60 toluene, chloroform and methanol. Finally, the yellow solid was dried under vacuum at  
61 60 °C for 12 h to obtain a final product mass of 117 mg, and then Co(Salen)-PIL and  
62  $\text{CoSO}_4 \cdot 7\text{H}_2\text{O}$  (mass ratio 1: 10) placed in a flask, vacuumed with nitrogen, and then  
63 injected methanol into the flask with a syringe. The mixture was then condensed and  
64 refluxed under nitrogen atmosphere for 72 h at 70 °C. After the reaction was completed  
65 and cooled to room temperature, the mixture was drained and washed out with DMF\  
66 MeOH to remove excess  $\text{CoSO}_4 \cdot 7\text{H}_2\text{O}$ , and finally the yellow powder was dried under  
67 vacuum at 60 °C for 12 h to give Co(Salen)-PIL. M(Salen)-PILs (M=Cu, Ni, Zn, Fe) is  
68 consistent with the above method, only by replacing the metal salts with  $\text{CuSO}_4$ ,  
69  $\text{NiSO}_4 \cdot 6\text{H}_2\text{O}$ ,  $\text{ZnSO}_4 \cdot 7\text{H}_2\text{O}$ ,  $\text{FeCl}_3$  respectively.

### 70 1.2.3 The synthesis of Co(Salen)-CHO

71 4-Hydroxyisophthalaldehyde (750 mg, 5 mmol) was placed in 100 mL flask, vacuumed  
72 and then passed through nitrogen for three times. Ethylenediamine (0.167 mL, 2.5  
73 mmol) was mixed with ethanol (20 mL), and then the mixture was injected into the  
74 flask with a syringe. After stirring well at room temperature, the solution appeared  
75 yellow. Then  $\text{CoSO}_4 \cdot 7\text{H}_2\text{O}$  (702.75 mg, 2.5 mmol) was dissolved in 5 mL deionized  
76 water, the solution was injected into a flask with a syringe, and the temperature was  
77 raised to 50 °C and stirred for 6 h in a nitrogen atmosphere. After the reaction was  
78 completed and cooled to room temperature, the mixture was drained and washed with

79 absolute ethanol, and finally the brownish powder was dried under vacuum at 60 °C for  
80 12 h to obtain Co(Salen)-CHO.

#### 81 **1.2.4 The synthesis of Co(Salen)-CMP**

82 Co(Salen)-CHO (194.4 mg, 0.6 mmol), melem (87 mg, 0.4 mmol) were placed in a 25  
83 mL flask, evacuated and passed with nitrogen, and then DMSO (5 mL) was injected  
84 into the flask with a syringe. The flask was further placed in oil bath. In presence of  
85 nitrogen protection, the mixture was heated in 120 °C for 6 h. Then, the temperature of  
86 the oil bath turned to 150 °C for 36 h. After cooling down to room temperature naturally,  
87 the formed precipitate was separated by the operation of centrifugation. The product  
88 was then washed with methanol solvent to remove unreacted monomers and formed  
89 oligomers. Finally, the yellow-brown powder was dried under vacuum at 60 °C for 12  
90 h, and then Co(Salen)-PIL and CoSO<sub>4</sub>·7H<sub>2</sub>O (mass ratio 1: 10) placed in a flask,  
91 vacuumed with nitrogen, and then injected methanol into the flask with a syringe. The  
92 mixture was then condensed and refluxed under nitrogen atmosphere for 72 h at 70 °C.  
93 After the reaction was completed and cooled to room temperature, the mixture was  
94 drained and washed out with DMF \ MeOH to remove excess CoSO<sub>4</sub>·7H<sub>2</sub>O, and finally  
95 the yellow-brown powder was dried under vacuum at 60 °C for 12 h to give Co(Salen)-  
96 CMP.

#### 97 **1.4 Photoelectrochemical measurements**

98 2 mg of the photocatalyst and 10 µL Nafion were dispersed in 0.2 mL ethanol and  
99 ultrasonicated for 10 minutes giving a slurry. The slurry was then coated onto ITO glass  
100 electrodes with an active area of 1 cm<sup>2</sup> and dried overnight at room temperature. The  
101 photocurrent response was tested using a three-electrode system with a working  
102 electrode (M(Salen)-PILs on ITO glass), counter electrode (Pt wire), and reference  
103 electrode (Hg/Hg<sub>2</sub>Cl<sub>2</sub>) in 0.2 M Na<sub>2</sub>SO<sub>4</sub> (pH = 7) aqueous solution. Photocurrent test is  
104 conducted at a constant voltage of 1.4 V vs. reversible hydrogen electrode (RHE).

## 105 **1.5 Mott–Schottky plots**

106 2 mg M(Salen)-PILs powder was mixed with 1.0 mL ethanol and 10  $\mu$ L Nafion  
107 solutions and sonicated for 20 min. The resulting mixture was deposited evenly on a  
108 glassy carbon electrode and left in air to dry. Mott-Schottky measurements were  
109 performed on an electrochemical workstation in 0.2 M Na<sub>2</sub>SO<sub>4</sub> electrolyte with a  
110 Hg/Hg<sub>2</sub>Cl<sub>2</sub> electrode as the reference electrode and a Pt plate as the counter electrode.

## 111 **1.6 Solid-state photoluminescence**

112 PL spectra were recorded by a FSL 1000 Edinburgh Instruments spectrofluorimeter at  
113 25 °C. The spectral acquisition was collected with excitation of 312 nm, and emission  
114 range from 340 nm to 800 nm. Decay time was calculated using 3 exponentials. All  
115 samples were tests on a quartz chip.

## 116 **1.7 Photocatalytic CO<sub>2</sub> reduction recycling experiments**

117 The container was filled with a mixed solution of CH<sub>3</sub>CN, TEOA, and H<sub>2</sub>O (15: 4: 1  
118 ratio, 100 mL), Co(Salen)-PIL (5 mg) and [Ru(bpy)<sub>3</sub>]Cl<sub>2</sub> (30 mg). After evacuating the  
119 container, CO<sub>2</sub> was injected to a pressure of 75 kPa. The photocatalytic reaction was  
120 tested for two hours each time and seven cycles were completed.

121 2. Supplemental figures and data

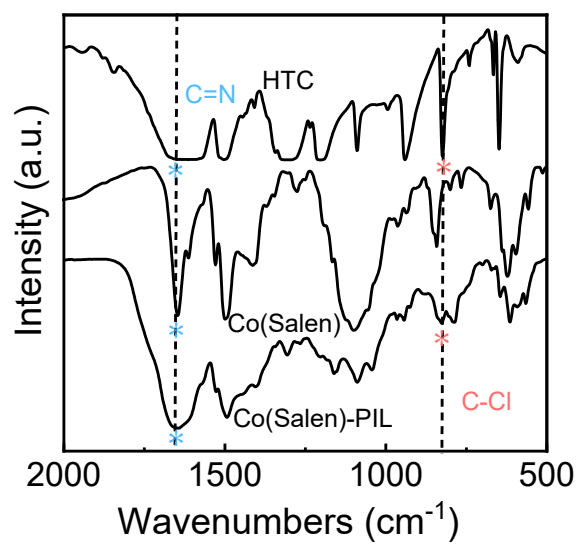

122  
123 **Fig. S1.** Fourier-transform infrared (FT-IR) spectra of Co(Salen)-PIL and monomers.  
124

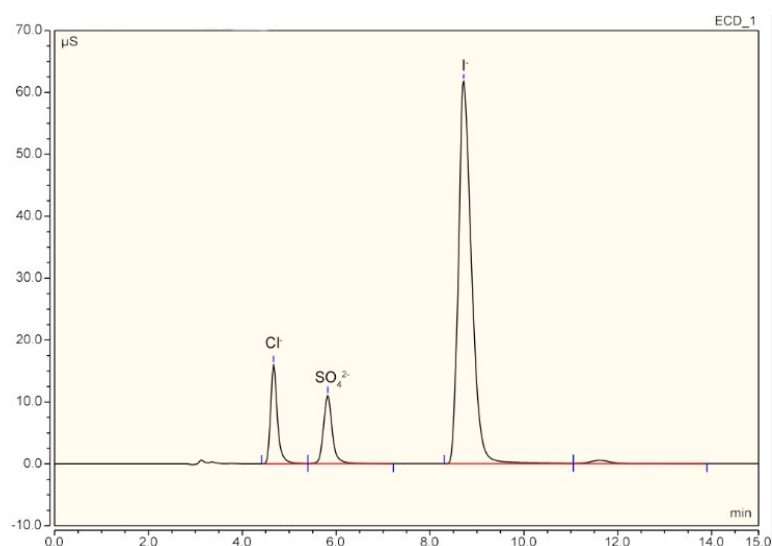

125

126 **Fig. S2.** Ion chromatography of Co(Salen)-PIL.

127

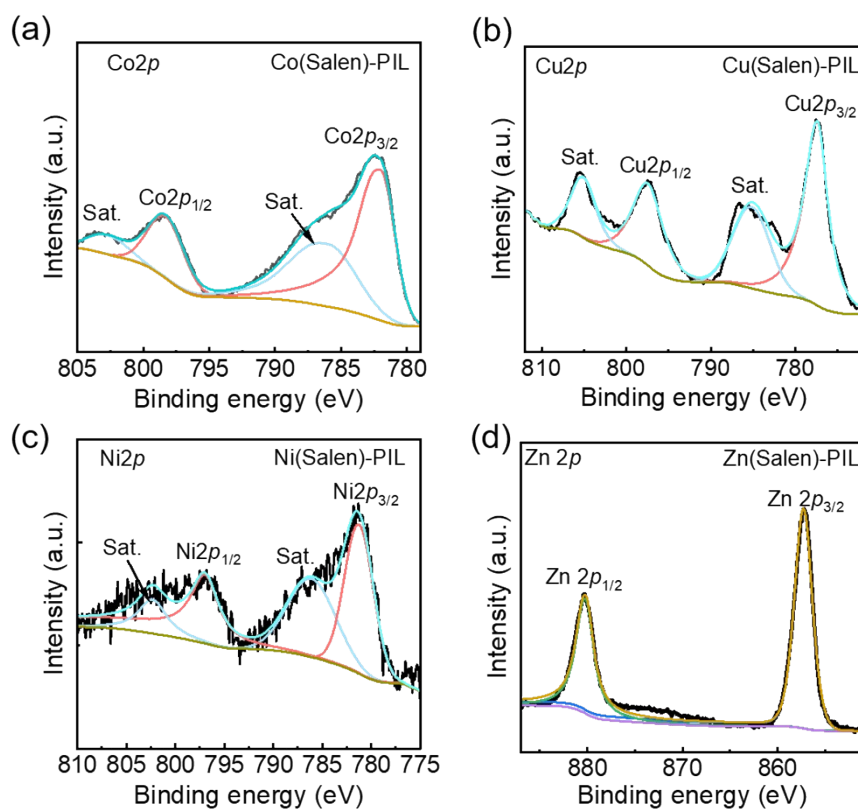

128

129 **Fig. S3.** (a) Co 2p XPS spectrum of Co(Salen)-PIL, (b) Cu 2p XPS spectrum of Cu(Salen)-PIL, (c)

130 Ni 2p XPS spectrum of Ni(Salen)-PIL, (d) Zn 2p XPS spectrum of Zn(Salen)-PIL.

131

132  
133  
134  
135

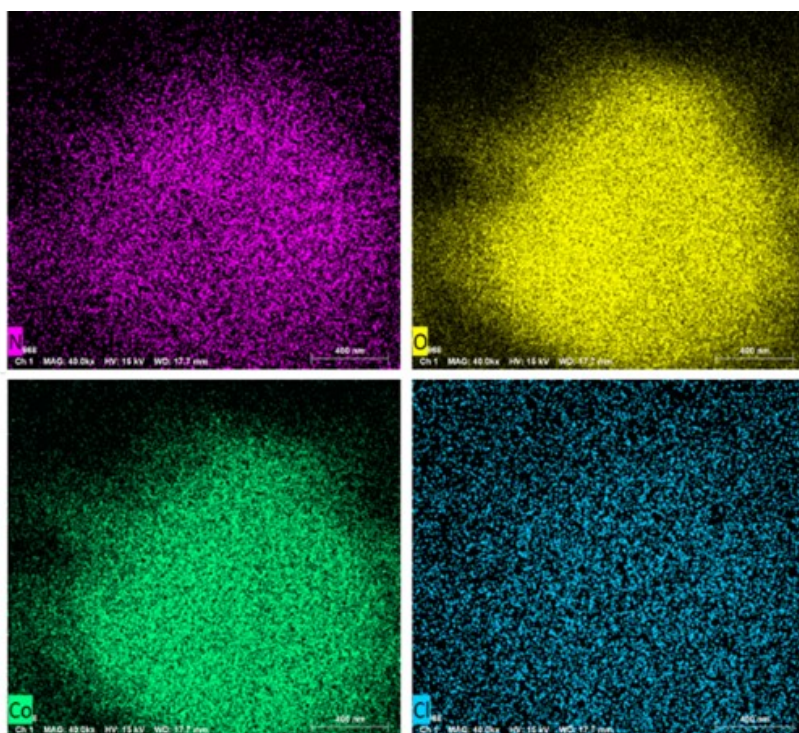

136  
137 **Fig. S4.** SEM mapping image of Co(Salen)-PIL.  
138

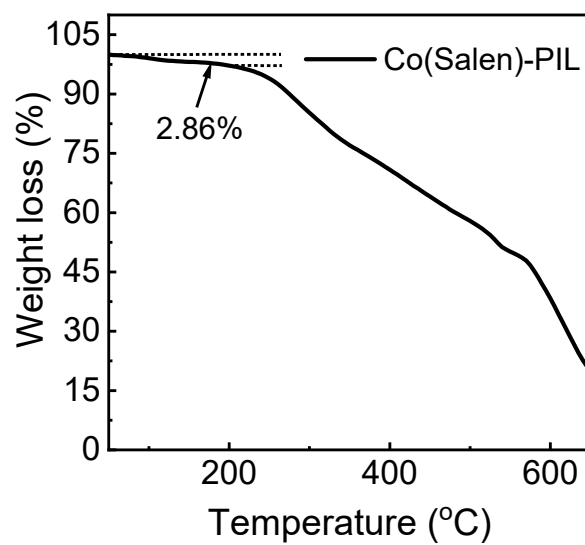

139

140 **Fig. S5.** Thermal gravimetric analysis (TGA) of Co(Salen)-PIL in Ar.

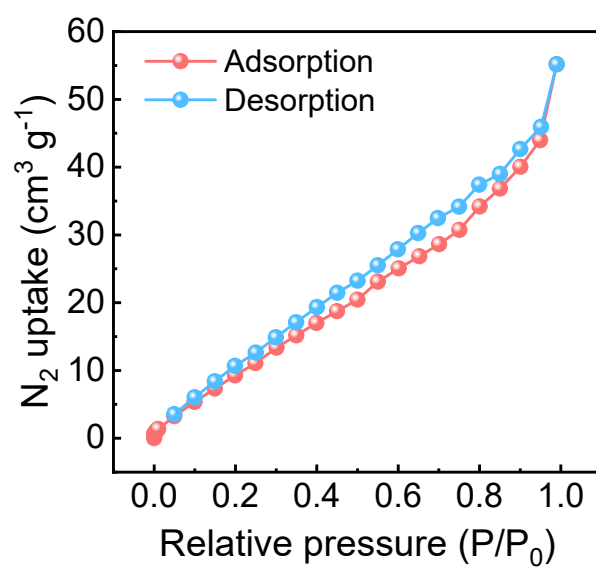

142

143 **Fig. S6.** Nitrogen adsorption and desorption isotherms for Co(Salen)-PIL.

144

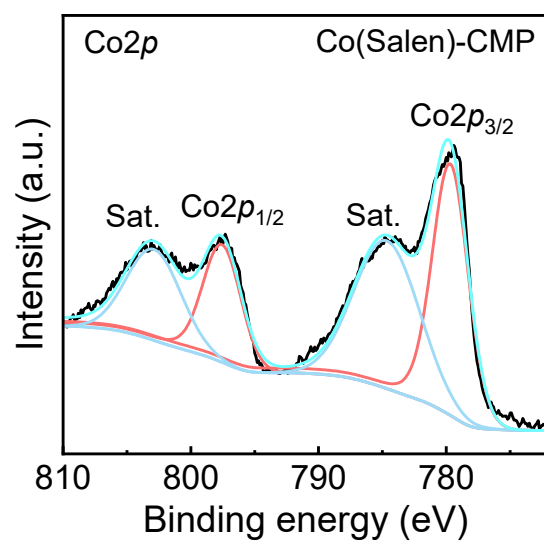

145

146 **Fig. S7.** Co 2p XPS spectrum of Co(Salen)-CMP.

147

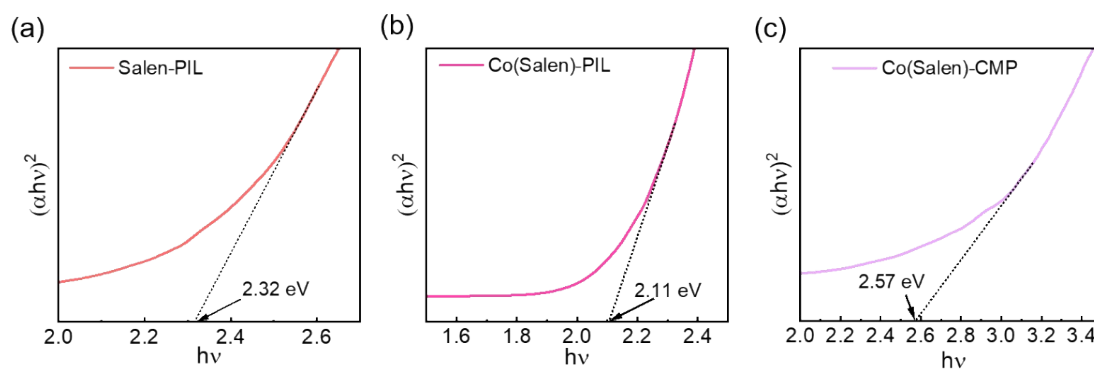

148  
 149 **Fig. S8.** band gaps of Salen-PIL, Co(Salen)-PIL and Co(Salen)-CMP determined using the  
 150 Kubelka–Munk function.  
 151

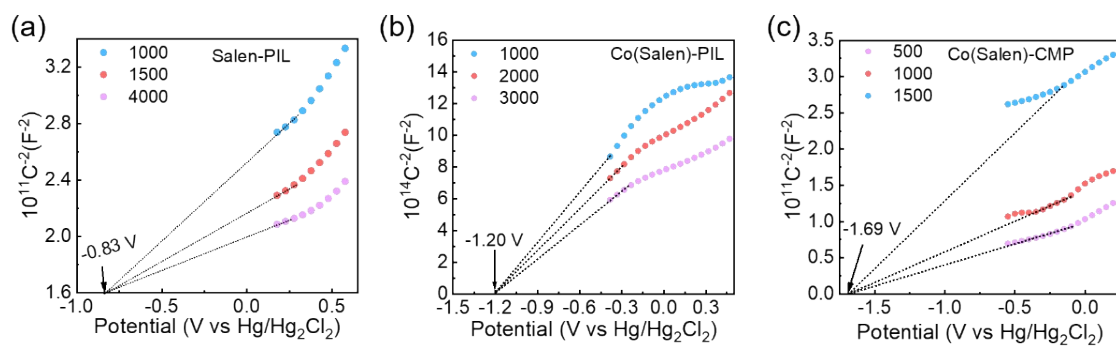

**Fig. S9.** Mott-Schottky plots of Salen-PIL, Co(Salen)-PIL and Co(Salen)-CMP.

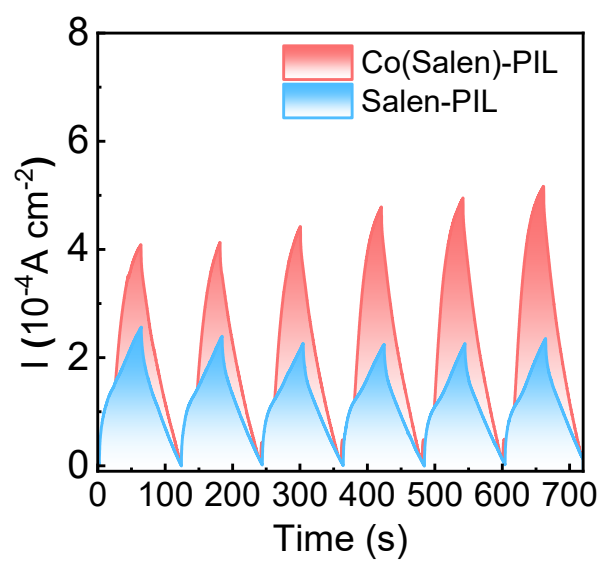

155

156 **Fig. S10.** Photocurrent measurement of Salen-PIL and Co(Salen)-PIL.

157

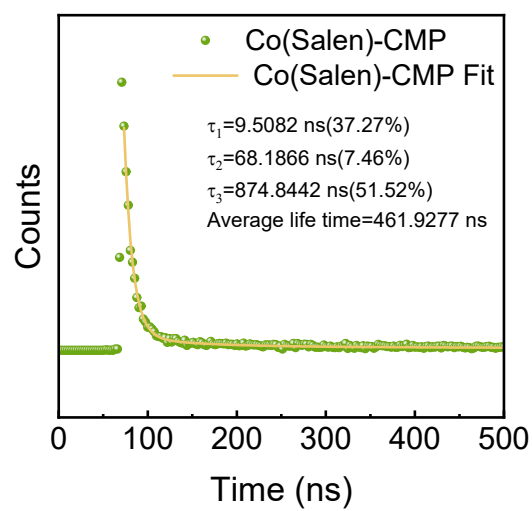

159

160 **Fig. S11.** Time-resolved PL decay spectra for Co(Salen)-CMP.

161

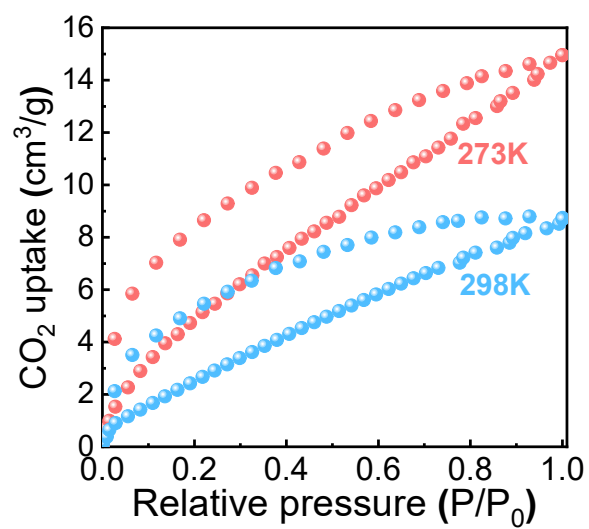

162

163 **Fig. S12.** CO<sub>2</sub> adsorption isotherms for Co(Salen)-PIL at 273 K and 298 K.

164

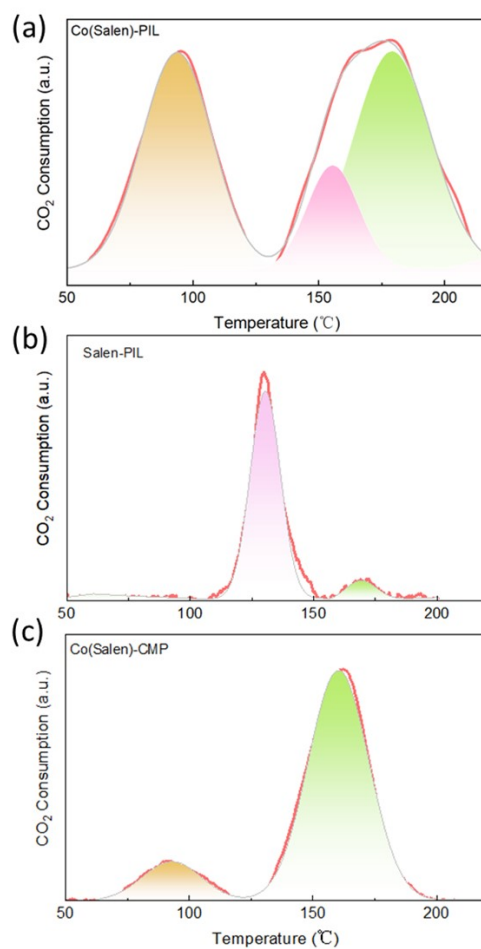

165

166 **Fig. S13.** CO<sub>2</sub>-TPD curves of the Co(Salen)-PIL, Salen-PIL and Co(Salen)-CMP.

167

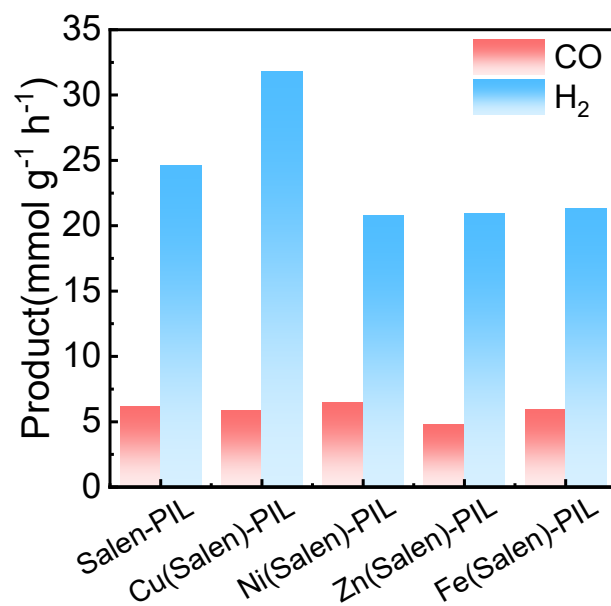

168

169 **Fig. S14.** Photocatalytic CO<sub>2</sub> reduction performance of Salen-PIL and M(Salen)-PILs (M=Cu, Ni,  
 170 Zn, Fe) under visible light irradiation ( $\lambda > 420$  nm, 300 W Xe light source), in 100 mL solvent  
 171 (MeCN / TEOA / H<sub>2</sub>O = 15/ 4/ 1) for 2 h.

172

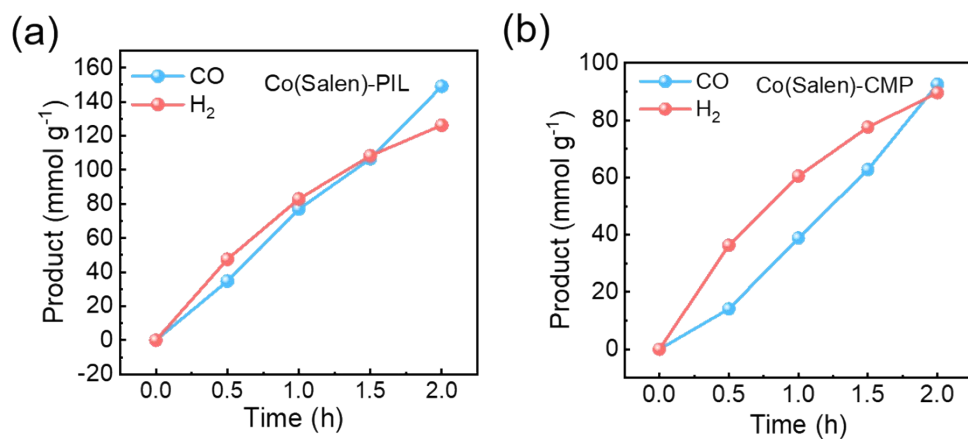

173  
 174 **Fig. S15.** CO production and H<sub>2</sub> production, under visible light irradiation ( $\lambda > 420$  nm, 300 W Xe  
 175 light source), from 1 mg Co(Salen)-PIL (a) and Co(Salen)-CMP (b) in 100 mL solvent (MeCN/  
 176 TEOA/ H<sub>2</sub>O = 15/ 4/ 1) for 2 h.  
 177

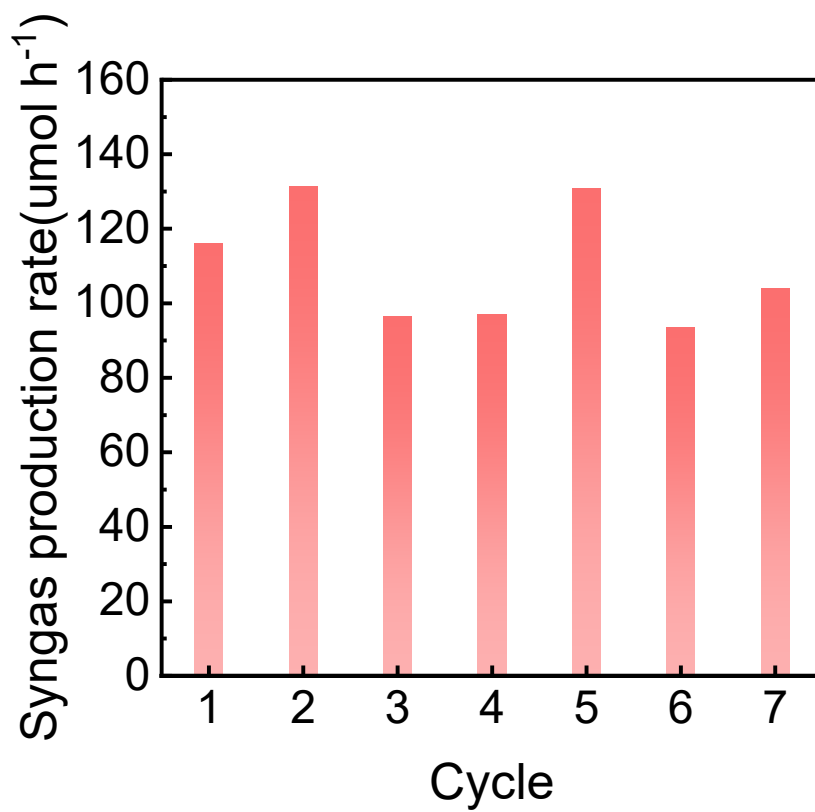

178

179 **Fig. S16.** Stability test of Co(Salen)-PIL in seven recycles for photocatalytic CO<sub>2</sub> reduction.

180

**Table S1.** Previously reported photocatalytic CO<sub>2</sub> reduction.

| Catalysts                                                           | Co-catalyst                           | Solvent                                              | CO rate<br>(mmol g <sup>-1</sup> h <sup>-1</sup> ) | H <sub>2</sub> rate<br>(mmol g <sup>-1</sup> h <sup>-1</sup> ) | Ref.         |
|---------------------------------------------------------------------|---------------------------------------|------------------------------------------------------|----------------------------------------------------|----------------------------------------------------------------|--------------|
| Co(Salen)-PIL                                                       | [Ru(bpy) <sub>3</sub> ] <sup>2+</sup> | CH <sub>3</sub> CN/H <sub>2</sub> O/TEOA<br>(15/1/4) | 74.6                                               | 63.1                                                           | This<br>work |
| Co(Salen)-PIL                                                       | [Ru(bpy) <sub>3</sub> ] <sup>2+</sup> | CH <sub>3</sub> CN/H <sub>2</sub> O/TEOA<br>(31/1/8) | 69.3                                               | 98.8                                                           | This<br>work |
| Ni-Co <sub>3</sub> O <sub>4</sub> NSDHN                             | [Ru(bpy) <sub>3</sub> ] <sup>2+</sup> | CH <sub>3</sub> CN/H <sub>2</sub> O/TEOA<br>(9/4/2)  | 89.1                                               | 80.9                                                           | 1            |
| Co-TAPT-COF-1                                                       | [Ru(bpy) <sub>3</sub> ] <sup>2+</sup> | CH <sub>3</sub> CN/H <sub>2</sub> O/TEOA<br>(3/1/1)  | 8.4                                                | 11.3                                                           | 2            |
| O <sub>1</sub> S <sub>3</sub> -Ni COPs                              | [Ru(bpy) <sub>3</sub> ] <sup>2+</sup> | CH <sub>3</sub> CN/H <sub>2</sub> O/TEOA<br>(3/1/1)  | 4.4                                                | 4.1                                                            | 3            |
| Co(OH) <sub>2</sub> -GR                                             | [Ru(bpy) <sub>3</sub> ] <sup>2+</sup> | CH <sub>3</sub> CN/H <sub>2</sub> O/TIPA<br>(3/2/1)  | 3.0                                                | 10.0                                                           | 4            |
| CoO-Mo <sub>8</sub> UNWs                                            | [Ru(bpy) <sub>3</sub> ] <sup>2+</sup> | CH <sub>3</sub> CN/H <sub>2</sub> O/TIPA<br>(4/1/1)  | 4.2                                                | 11.6                                                           | 5            |
| Cu <sub>2</sub> S@R <sub>OH</sub> -NiCo <sub>2</sub> O <sub>3</sub> | [Ru(bpy) <sub>3</sub> ] <sup>2+</sup> | CH <sub>3</sub> CN/H <sub>2</sub> O/TIPA<br>(4/1/1)  | 7.1                                                | 2.8                                                            | 6            |
| POP2-Fe                                                             | [Ru(bpy) <sub>3</sub> ] <sup>2+</sup> | DMF/TEOA<br>(33/1)                                   | 3.0                                                | 3.8                                                            | 7            |
| Co@COF-TVBT-<br>Bpy                                                 | [Ru(bpy) <sub>3</sub> ] <sup>2+</sup> | CH <sub>3</sub> CN/H <sub>2</sub> O/TIPA<br>(4/1/1)  | 1.1                                                | 1.2                                                            | 8            |

185 **3. References**

- 186 1 G. Qian, W. Y. Lyu, X. Zhao, J. Y. Zhou, R. Q. Fang, F. L. Wang, Y. W. Li,  
187 Angew. Chem. Int. Ed., 2022, **61**, e202210576.
- 188 2 W. Zhou, X. Wang, W. L. Zhao, N. Y. Lu, D. Cong, Z. Li, P. G. Han, G. Q. Ren,  
189 L. Sun, C. C. Liu, W.-Q. Deng, Nat. Commun., 2023, **14**, 6971.
- 190 3 P. J. Li, W. B. Chen, Y. Yang, J. Y. Shen, ACS Appl. Mater. Interfaces, 2023, **15**,  
191 40519-40528.
- 192 4 K. Q. Lu, J. G. Hao, Y. Wei, B. Weng, S. Ge, K. Yang, S. Lu, M. Q. Yang, Y. Liao,  
193 Inorg. Chem., 2023, **63**, 795-802.
- 194 5 H. Z. Yang, D. R. Yang, X. Wang, Angew. Chem. Int. Ed., 2020, **59**, 15527-  
195 15531.
- 196 6 L. Li, X. Y. Dai, D.-L. Chen, Y. X. Zeng, Y. Hu, X. W. Lou, Angew. Chem. Int.  
197 Ed., 2022, **61**.
- 198 7 X. Y. Yao, K. H. Chen, L.-Q. Qiu, Z.-W. Yang, L.-N. He, Chem. Mater., 2021,  
199 **33**, 8863-8872.
- 200 8 J. X. Cui, Y. M. Fu, B. Meng, J. Zhou, Z. Y. Zhou, S. M. Liu, Z. M. Su, J. Mater.  
201 Chem. A, 2022, 13418-13427.

202
